# Supplementary material for: Chronotype, sleep quality, depression and pre‐sleep rumination: A diary and actigraphy study
Source: PubMed Central journal article supplement (PMC11612836; doi:10.1111/ejn.16551), 2024-10-05
Supplement: EJN-60-6593-s001.pdf [file EJN-60-6593-s001.pdf]

Supplementary Tables

Table S1. Subjective and actigraphy-based sleep parameters, stratified by chronotype categories.

|                           | <b>E-types</b>         | <b>M-types</b>         |               |           |                 |                |
|---------------------------|------------------------|------------------------|---------------|-----------|-----------------|----------------|
|                           | <i>N</i> = 53          | <i>N</i> = 35          |               |           |                 |                |
|                           | <i>M</i> ( <i>SD</i> ) | <i>M</i> ( <i>SD</i> ) | <i>F</i> test | <i>df</i> | <i>Error df</i> | <i>p</i> value |
| <b><i>Sleep Diary</i></b> |                        |                        |               |           |                 |                |
| <b>SOL in minutes</b>     | 21.24 (18.3)           | 14.52 (8.4)            | 4.21          | 1         | 82              | <b>.04</b>     |
| <i>Missing</i>            | 2                      | 1                      |               |           |                 |                |
| <b>TST in hours</b>       | 7.47 (0.9)             | 7.76 (0.7)             | 1.01          | 1         | 82              | .32            |
| <i>Missing</i>            | 2                      | 1                      |               |           |                 |                |
| <b>WASO in minutes</b>    | 9.30 (8.1)             | 9.40 (9.7)             | 0.004         | 1         | 82              | .95            |
| <i>Missing</i>            | 2                      | 1                      |               |           |                 |                |
| <b><i>Actigraphy</i></b>  |                        |                        |               |           |                 |                |
| <b>SOL in minutes</b>     | 21.60 (13.5)           | 14.23 (11.3)           | 4.01          | 1         | 75              | <b>.05</b>     |
| <i>Missing</i>            | 7                      | 3                      |               |           |                 |                |
| <b>TST in hours</b>       | 6.71 (1.2)             | 6.74 (0.9)             | 0.03          | 1         | 75              | .86            |
| <i>Missing</i>            | 7                      | 3                      |               |           |                 |                |
| <b>WASO in minutes</b>    | 28.50 (20.2)           | 31.82 (20.3)           | 0.55          | 1         | 75              | .46            |
| <i>Missing</i>            | 7                      | 3                      |               |           |                 |                |

p values result from **MANCOVAs with alcohol use as covariate.**

Table S2. Summary of Statistical Mediation Model

| Model                   | Effect of IV on M(a) |          | Effect of M on DV(b) |            | Direct Effect(c) of IV on DV |            | Indirect Effect (SE) of IV on DV (a x b) | 95% CI (a x b) |
|-------------------------|----------------------|----------|----------------------|------------|------------------------------|------------|------------------------------------------|----------------|
|                         | Effect (SE)          | <i>p</i> | Effect (SE)          | <i>p</i>   | Effect (SE)                  | <i>p</i>   |                                          |                |
| 1 Subjective SOL (n=84) | -2.52(2.20)          | .26      | .43(.17)             | <b>.01</b> | -5.90(3.32)                  | .08        | -1.07(1.39)                              | -4.72 to .52   |
| 3 Objective SOL (n=79)  | -2.54(2.30)          | .27      | -.19(.14)            | .20        | -7.61(2.91)                  | <b>.01</b> | .47(.70)                                 | -.62 to 2.13   |

IV: Independent Variable (Chronotype), M: Mediator (pre-sleep rumination), DV: Dependent Variable (subjective /objective SOL)

Numbers in bold indicate significant results ( $p < .05$ ).

Table S3. Summary of Statistical Mediation Model, with alcohol consumption as covariate.

| Model                   | Effect of IV on M(a) |     | Effect of M on DV(b) |            | Direct Effect(c) of IV on DV |            | Indirect Effect (SE) of IV on DV (a x b) | 95% CI (a x b) |
|-------------------------|----------------------|-----|----------------------|------------|------------------------------|------------|------------------------------------------|----------------|
|                         | Effect (SE)          | p   | Effect (SE)          | p          | Effect (SE)                  | p          |                                          |                |
| 2 Subjective SOL (n=83) | -2.94 (2.35)         | .22 | .44 (.17)            | <b>.01</b> | -6.10 (3.56)                 | .09        | -1.29 (1.40)                             | -4.65 to .67   |
| 4 Objective SOL (n=76)  | -3.53 (2.53)         | .17 | -.20 (.15)           | .17        | -7.15(3.19)                  | <b>.03</b> | .71 (.88)                                | -.51 to 2.88   |

IV: Independent Variable (chronotype), M: Mediator (pre-sleep rumination), DV: Dependent Variable (subjective / objective SOL).

Numbers in bold indicate significant results (p < .05).
